# Supplementary material
Source: Research Square preprint supplement (doi:10.21203/rs.3.rs-9154240/v1)
Supplement: Supplementary file 1 [file 2708525d149dfcaea917b7a1.docx]

**Figure S1. Analysis of the SPP1–CD44 signaling axis**

**(A) Analysis of ligand–receptor interaction strength between SPP1 and its receptors.**

**(B) Macrophage-mediated SPP1–CD44 cell communication network.**

**(C) Bubble plot of SPP1 signaling pathway–related interactions.**

**(D) Functional role analysis heatmap showing the contribution of different cell types within the SPP1 signaling pathway.**

**(E) Heatmap of major senders and receivers in the SPP1 signaling pathway.**

**Figure S2. Cell–cell communication analysis between the HCC core region and the para-carcinoma region**

(A–B) Comparison of the number and strength of cell–cell interactions. The left panel shows differences in the number of interactions between the core and border groups, and the right panel shows differences in interaction strength between the two groups.

(C) Heatmap of differential cell–cell interactions. The left panel shows differences in the number of interactions, while the right panel shows differences in interaction strength between the core and border groups. The color intensity represents the degree of difference.

(D) Comparative analysis of conserved and specific signaling pathways. Stacked and non-stacked bar plots are used to show differences in conserved and specific signaling pathways within the cell–cell communication networks of the core and border regions.
